# Supplementary material for: K-intercalated polymeric carbon nitride with nitrogen defects for efficient photocatalytic H2O2 production
Source: Royal Society of Chemistry journal article supplement (doi:10.1039/d2nj06273a), 2023-01-01
Supplement: d2nj06273a1.pdf [file d2nj06273a1.pdf]

## Supporting Information

### **K-intercalated polymeric carbon nitride with nitrogen defects for efficient photocatalytic H<sub>2</sub>O<sub>2</sub> production**

**Qinyuan Wang <sup>a</sup>, Lulu Bai <sup>a</sup>, Qiang Wu <sup>a\*</sup>, Weifeng Yao <sup>a,b,c\*</sup>**

<sup>a</sup> Shanghai Key Laboratory of Materials Protection and Advanced Materials in Electric Power, College of Environmental & Chemical Engineering, Shanghai University of Electric Power, Shanghai, P. R. China.

<sup>b</sup> Shanghai Institute of Pollution Control and Ecological Security, Shanghai, PR China.

<sup>c</sup> Shanghai Engineering Research Center of Heat-exchange System and Energy Saving, Shanghai University of Electric Power, Shanghai, PR China

\*Corresponding author E-mail address: [yaoweifeng@shiep.edu.cn](mailto:yaoweifeng@shiep.edu.cn);

[qiangwu@shiep.edu.cn](mailto:qiangwu@shiep.edu.cn)

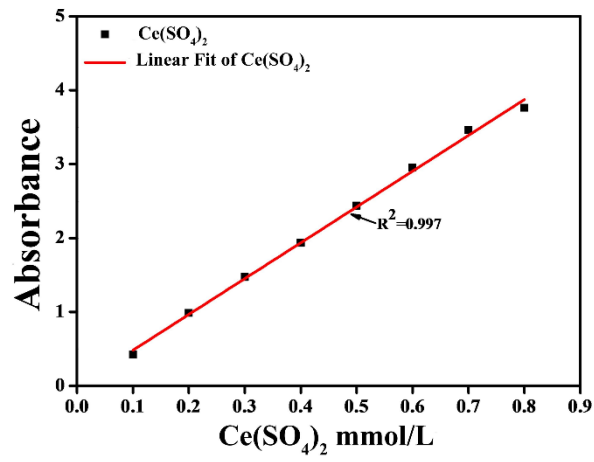

Fig. S1.  $\text{Ce}(\text{SO}_4)_2$  standard curve for concentration

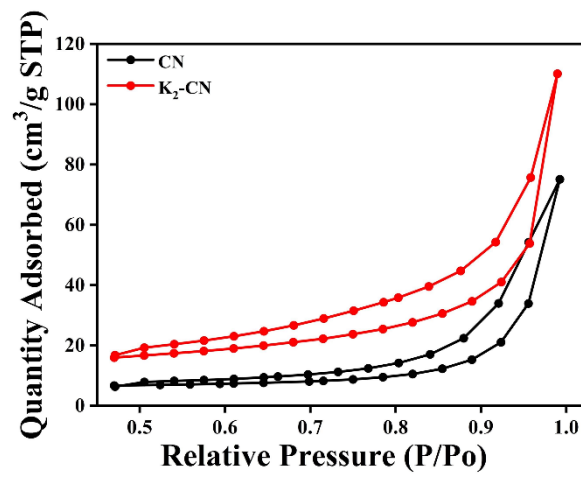

Fig. S2.  $\text{N}_2$  adsorption-desorption isotherm curves of as-prepared sample

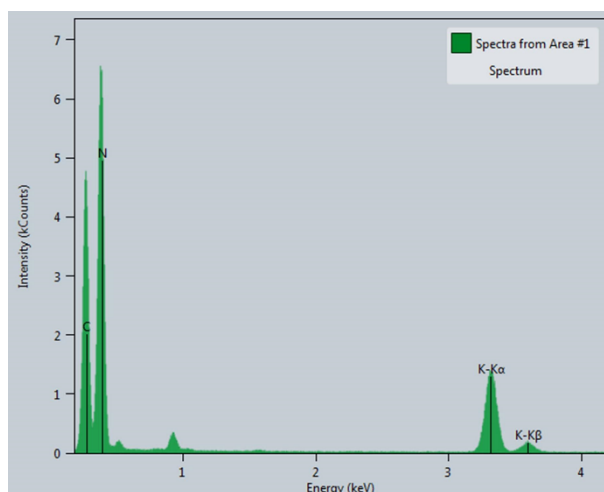

**Fig.S3.** EDS spectrum of  $K_2$ -CN

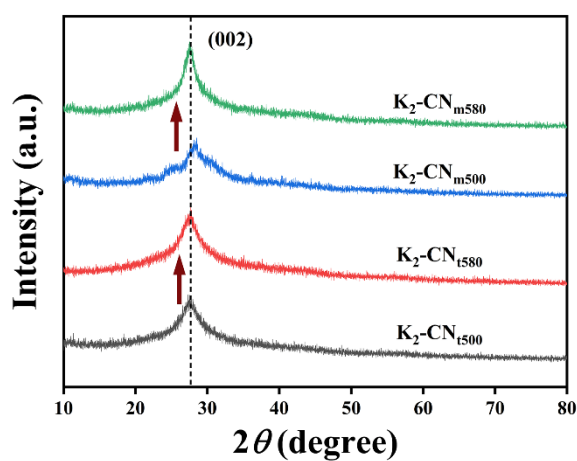

**Fig. S4.** XRD patterns of  $K_2$ -CN<sub>t580</sub>,  $K_2$ -CN<sub>m580</sub>,  $K_2$ -CN<sub>t500</sub>

**Table. S1.** Elemental Composition and the N/C Atomic Ratios of the  $K_2$ -CN<sub>m500</sub> and  $K_2$ -CN<sub>t500</sub>

| Catalyst                  | C (wt %) | N (wt %) | N/C (mol/mol) | Weight (mg) |
|---------------------------|----------|----------|---------------|-------------|
| $K_2$ -CN <sub>m500</sub> | 26.92    | 45.05    | 1.67          | 2.00        |
| $K_2$ -CN <sub>t500</sub> | 26.01    | 43.08    | 1.65          | 2.00        |
| $K_2$ -CN <sub>m580</sub> | 25.21    | 41.05    | 1.63          | 2.00        |
| $K_2$ -CN <sub>t580</sub> | 26.62    | 43.13    | 1.62          | 2.00        |

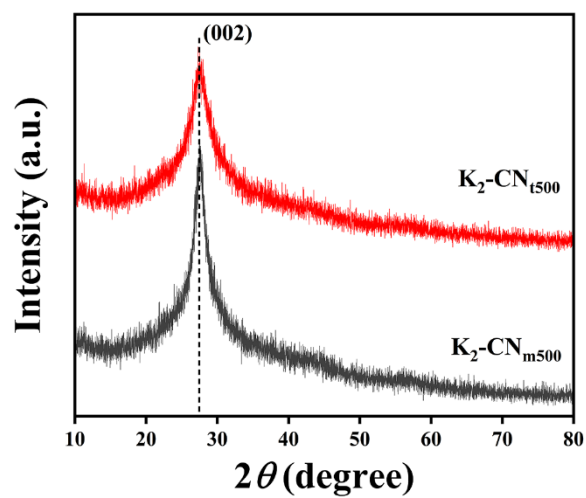

Fig. S5. XRD patterns of  $K_2-CN_{t500}$  and  $K_2-CN_{m500}$

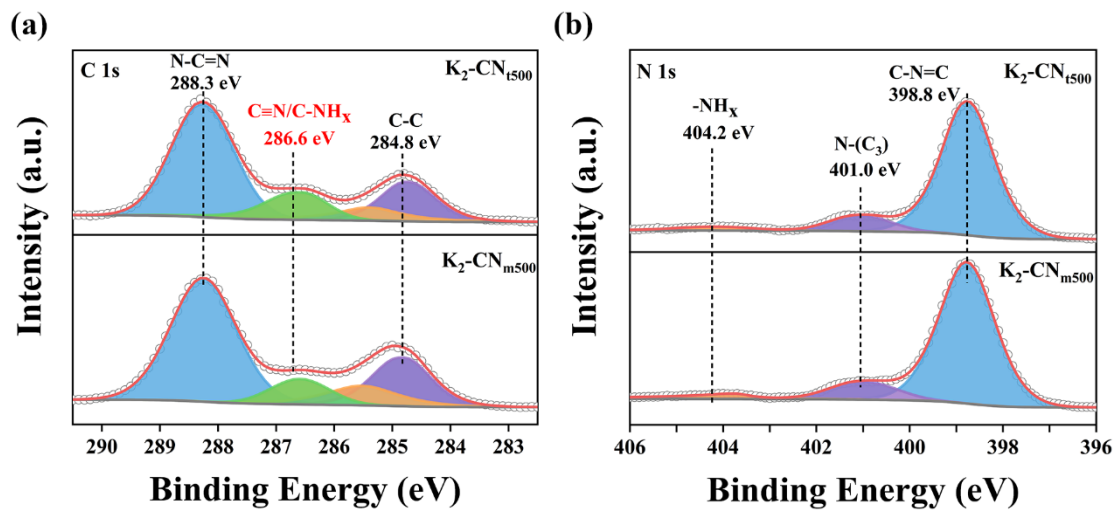

Fig. S6. (a) C 1s XPS spectra and (b) N 1s XPS spectra of  $K_2-CN_{t500}$  and  $K_2-CN_{m500}$  photocatalysts.

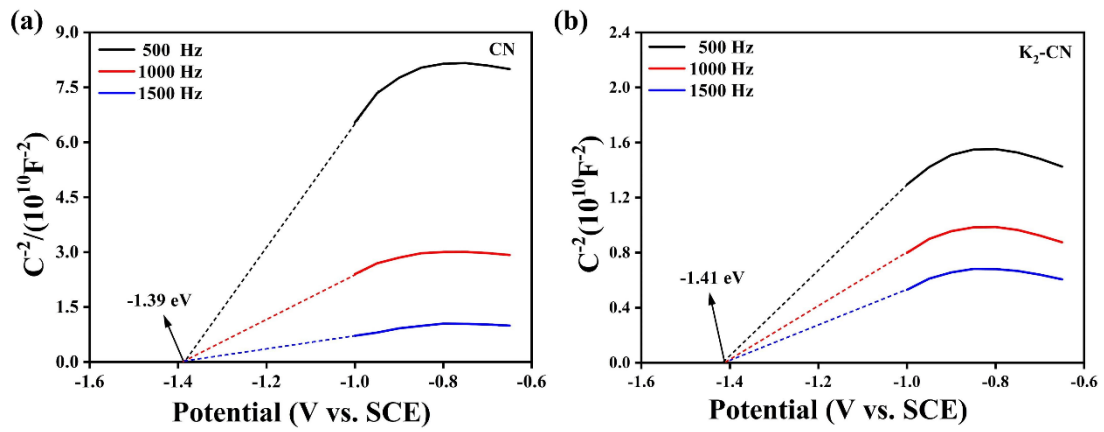

**Fig. S7.** Model-Schottky curves of plots (potential vs. SCE) of (a) CN and (b)  $\text{K}_2\text{-CN}$  at 500 Hz, 1000 Hz and 1500 Hz

### The Calculation of Apparent Quantum Efficiency:

$$AQE = \frac{N_e}{N_p} = \frac{\text{number of consumed electrons}}{\text{number of incoming photons}} = \frac{10^9 * (v * N_A * K) * (h * c)}{I * A * \lambda} * 100\% \quad (1)$$

$N_e$ : number of consumed electrons;  $N_p$ : number of incoming photons;  $v$ : the reaction rate;  $N_A$ : Avogadro's number ( $6.02 * 10^{23} \text{ mol}^{-1}$ );  $K$ : number of electrons transferred by the reaction;  $h$ : Planck constant ( $6.62 * 10^{-34} \text{ J}\cdot\text{s}$ );  $c$ : the speed of light ( $3.0 * 10^8 \text{ m}\cdot\text{s}^{-1}$ );  $I$ : optical functional density ( $\text{W}\cdot\text{m}^{-2}$ );  $A$ : incident illumination area ( $\text{m}^2$ );  $\lambda$ : wavelength of incident light ( $\lambda=420\text{nm}$ ). In this work, " $I$ " is  $9.02 \text{ mV}\cdot\text{cm}^{-2}$ , the calculated AQE is 15.37%.

### The Koutecky-Levich Equation:

$$j^{-1} = j_k^{-1} + B^{-1} \Omega^{-1/2} \quad (2)$$

$$B = 0.2nFv^{-1/6}CD^{-2/3} \quad (3)$$

The  $j$ ,  $j_k$ ,  $\Omega$ ,  $n$ ,  $F$ ,  $v$ ,  $C$  and  $D$  respectively represent the current density; kinetic current density; rotational speed; Faraday's constant; the kinetic viscosity of water; the volumetric concentration of oxygen and the diffusion coefficient of oxygen.

**Table. S2. Summary of the photocatalytic H<sub>2</sub>O<sub>2</sub> production with modified g-C<sub>3</sub>N<sub>4</sub> photocatalysts**

| <b>Material</b>                       | <b>Sacrificial Reagent</b> | <b>Concentration of photocatalyst</b> | <b>pH</b> | <b>Irradiation conditions</b> | <b>H<sub>2</sub>O<sub>2</sub> yields</b> | <b>AQE</b> | <b>Rate multiples of raw materials</b> | <b>Ref.</b>      |
|---------------------------------------|----------------------------|---------------------------------------|-----------|-------------------------------|------------------------------------------|------------|----------------------------------------|------------------|
| CoP/g-C <sub>3</sub> N <sub>4</sub>   | ethanol                    | 1 mg/mL                               | 7         | 420 nm                        | 140 μmol/L, 2h                           | ----       | 1.35 times                             | 1                |
| OCN-NBS                               | isopropanol                | 1 mg/mL                               | 3         | 325 nm                        | 892 μmol/L, 1h                           | ----       | 2.0 times                              | 2                |
| Au/C <sub>3</sub> N <sub>4</sub> -500 | isopropanol                | 1 mg/mL                               | 3         | 420 nm                        | 330 μmol/L, 1h                           | ----       | 2.3 times                              | 3                |
| OCN8                                  | isopropanol                | 1.2 mg/mL                             | 7         | λ ≥ 420 nm                    | 1965 μmol/L, 1h                          | ----       | 2.6 times                              | 4                |
| Au/BiVO <sub>4</sub> -CN              | isopropanol                | 1 mg/mL                               | 3         | 385 nm                        | 675.89 μmol/L, 1h                        | 6.7 %      | 2.65 times                             | 5                |
| ac-g-c <sub>3</sub> n <sub>4</sub>    | ethanol                    | 0.67 mg/mL                            | 7         | 420 nm                        | 530 μmol/L, 1h                           | ----       | 3.0 times                              | 6                |
| CN4                                   | isopropanol                | 0.2 mg/mL                             | 7         | 420 nm                        | 287 μmol/L, 1h                           | 27.8 %     | 3.3 times                              | 7                |
| g-C <sub>3</sub> N <sub>4</sub> /BDI  | ----                       | 0.6 mg/mL                             | 7         | λ > 420 nm                    | 9.6 μmol/L, 1h                           | ----       | 4.0 times                              | 8                |
| NVCNS                                 | isopropanol                | 0.2 mg/mL                             | 7         | 420 nm                        | 4413.1 μmol/g, 1h                        | 3.0 %      | 4.6 times                              | 9                |
| PI <sub>x</sub> -NCN                  | ----                       | 1 mg/mL                               | 7         | 420 nm                        | 120 μmol/L, 2h                           | 3.2 %      | 6.0 times                              | 10               |
| PCN-5/CS                              | AgNO <sub>3</sub>          | 1 mg/mL                               | 9         | 450 nm                        | 826 μmol/g, 1h                           | 18.1 %     | 6.55 times                             | 11               |
| P-CN                                  | isopropanol                | 1 mg/mL                               | 7         | > 420 nm                      | 1500 μmol/L, 3h                          | ----       | 6.6 times                              | 12               |
| TC/CN                                 | ethanol                    | 1 mg/mL                               | 7         | 420 nm                        | 600 μmol/L, 1h                           | 4.62 %     | 9.3 times                              | 13               |
| CN <sub>QDS</sub> @MA-Ag              | isopropanol                | 1 mg/mL                               | 7         | 420 nm                        | 39.82 μmol/L, 1h                         | ----       | 10.0 times                             | 14               |
| PCNHS-17                              | isopropanol                | 0.5 mg/mL                             | 7         | λ > 420 nm                    | 90 μmol/L, 1h                            | ----       | 11.2 times                             | 15               |
| K <sub>2</sub> -CN                    | isopropanol                | 1 mg/mL                               | 7         | λ > 420 nm                    | 19663 μmol/L, 1h                         | 15.37 %    | 14.0 times                             | <b>This work</b> |

## References

1. Y. Peng, L. Wang, Y. Liu, H. Chen, J. Lei and J. Zhang, *Eur. J. Inorg. Chem.*, 2017, **2017**, 4797-4802.
2. F. Farzin, M. K. Rofouei, M. Mousavi and J. B. Ghasemi, *J. Phys. Chem. Solids*, 2022, **163**.
3. X. Chang, J. Yang, D. Han, B. Zhang, X. Xiang and J. He, *Catalysts*, 2018, **8**.
4. Y. Zhang, L. Zhang, D. Zeng, W. Wang, J. Wang, W. Wang and W. Wang, *Chinese Journal of Catalysis*, 2022, **43**, 2690-2698.
5. H. Shi, Y. Li, X. Wang, H. Yu and J. Yu, *Appl. Catal., B*, 2021, **297**.
6. Q. Hu, Y. Dong, K. Ma, X. Meng and Y. Ding, *J. Catal.*, 2022, **413**, 321-330.
7. C. Feng, L. Tang, Y. Deng, J. Wang, J. Luo, Y. Liu, X. Ouyang, H. Yang, J. Yu and J. Wang, *Adv. Funct. Mater.*, 2020, **30**.
8. Y. Kofuji, S. Ohkita, Y. Shiraishi, H. Sakamoto, S. Tanaka, S. Ichikawa and T. Hirai, *ACS Catalysis*, 2016, **6**, 7021-7029.
9. Y. Zheng, Y. Luo, Q. Ruan, J. Yu, X. Guo, W. Zhang, H. Xie, Z. Zhang, J. Zhao and Y. Huang, *J. Colloid Interface Sci.*, 2022, **609**, 75-85.
10. L. Yang, G. Dong, D. L. Jacobs, Y. Wang, L. Zang and C. Wang, *J. Catal.*, 2017, **352**, 274-281.
11. H. Zhang and X. Bai, *J. Colloid Interface Sci.*, 2022, **627**, 541-553.
12. L. Xue, H. Sun, Q. Wu and W. Yao, *J. Colloid Interface Sci.*, 2022, **615**, 87-94.
13. S. Lin, N. Zhang, F. Wang, J. Lei, L. Zhou, Y. Liu and J. Zhang, *ACS Sustain. Chem. Eng.*, 2020, **9**, 481-488.
14. M. Yin, X. Chen, Y. Wan, W. Zhang, L. Feng, L. Zhang and H. Wang, *ChemCatChem*, 2020, **12**, 1512-1518.
15. X. Dang, R. Yang, Z. Wang, S. Wu and H. Zhao, *Journal of Materials Chemistry A*, 2020, **8**, 22720-22727.
